# Supplementary material
Source: Elsevier journal article supplement (https://www.sciencedirect.com/science/article/pii/S1679007315000158)
Supplement: mmc2 [file S1679007315000158:mmc2.pdf]

# Motivação e Sucesso na gestão de Unidades de Conservação no Brasil

## 1. Nome

## \*2. Nome da Unidade de Conservação que representa

## \*3. Você participa ou já participou de algum mecanismo inovador ou arranjo gerencial alternativo voltado a complementar a equipe de gestão da UC ?

☐ Sim

☐ Não

## 4. Quais melhorias foram buscadas?

- ☐ Diminuição da rotatividade de funcionários
- ☐ Aumento na quantidade de funcionários
- ☐ Aumento na quantidade de funcionários para o administrativo
- ☐ Melhoria na formação dos funcionários
- ☐ Contratação de pessoas locais

Outro (especifique)

## 5. Compartilhe conosco o tipo de mecanismo ou arranjo implementado citando rapidamente os principais resultados obtidos e as dificuldades enfrentadas (máximo de 120 palavras)?

## Motivação e Sucesso na gestão de Unidades de Conservação no Brasil

**\*6. Você participa ou já participou de algum mecanismo inovador ou arranjo gerencial alternativo de parceria / acordo / cooperação voltado a proporcionar maior independência econômica e financeira da UC ?**

☐ Sim

☐ Não

**7. Que tipo de mecanismo / arranjo foi elaborado ?**

☐ Parcerias Público-Privado (PPP)

☐ Gestão compartilhada

☐ Co-gestão

☐ Cooperação com parceiro público nacional

☐ Cooperação com parceiro público internacional

☐ Cooperação com iniciativa privada nacional

☐ Cooperação com iniciativa privada internacional

☐ Acordo institucional

☐ Pagamento por Serviço Ambiental (PSA)

Outro (especifique)

**8. Compartilhe conosco o tipo de mecanismo ou arranjo implementado citando rapidamente os principais resultados obtidos e as dificuldades enfrentadas(máximo de 120 palavras):**

**\*9. Você participa ou já participou de algum mecanismo inovador ou arranjo gerencial alternativo que fizeram da UC um indutor de desenvolvimento local e de conservação ambiental no seu entorno?**

☐ Sim

☐ Não

## Motivação e Sucesso na gestão de Unidades de Conservação no Brasil

### 10. Qual forma de desenvolvimento local ou conservação ambiental foi provocada?

- ☐ Geração de renda das famílias
- ☐ Sensibilização / Educação
- ☐ Criação de empresas
- ☐ Criação de empregos
- ☐ Participação social na conservação (ex : monitoramento etc...)
- ☐ Ordenamento territorial
- ☐ Criação de RPPN
- ☐ Pactos para diminuir os impactos no entorno

Outro (especifique)

### 11. Compartilhe conosco o tipo de mecanismo ou arranjo implementado citando rapidamente os principais resultados obtidos e as dificuldades enfrentadas(máximo de 120 palavras):

### 12. Sem necessariamente ter participado, você conhece algum outro mecanismo inovador ou arranjo gerencial alternativo visando melhorar os recursos humanos e/ou a autonomia financeira / econômica da UC e/ou que teria induzido desenvolvimento local / conservação ambiental no entorno ? Se for o caso, descreva rapidamente onde e que tipo de mecanismo / arranjo foi implementado (máximo de 120 palavras)

## Motivação e Sucesso na gestão de Unidades de Conservação no Brasil

**13. Pontue de 1 a 5 (sendo 5 maior importância) quais são os principais obstáculos para melhorar os recursos humanos e a autonomia financeira / econômica das UCs e o desenvolvimento local induzido por elas:**

|                                     | 5                     | 4                     | 3                     | 2                     | 1                     | N/A                   |
|-------------------------------------|-----------------------|-----------------------|-----------------------|-----------------------|-----------------------|-----------------------|
| Regulamentação inadequada           | <input type="radio"/> |
| Recursos financeiros insuficientes  | <input type="radio"/> |
| Quadro insuficiente de funcionários | <input type="radio"/> |
| Baixa capacitação                   | <input type="radio"/> |
| Pouco comprometimento político      | <input type="radio"/> |

Outro (especifique)

**14. Pontue de 1 a 5 (sendo 5 maior importância) os principais fatores de sucesso que permitam melhorar os recursos humanos, a autonomia financeira / econômica das UCs e o desenvolvimento local induzido por elas:**

|                                   | 5                     | 4                     | 3                     | 2                     | 1                     | N/A                   |
|-----------------------------------|-----------------------|-----------------------|-----------------------|-----------------------|-----------------------|-----------------------|
| Regulamentação adequada           | <input type="radio"/> |
| Recursos financeiros suficientes  | <input type="radio"/> |
| Quadro suficiente de funcionários | <input type="radio"/> |
| Alta capacitação                  | <input type="radio"/> |
| Comprometimento político          | <input type="radio"/> |

Outro (especifique)

**15. No contexto desse projeto, você teria alguma sugestão ou comentário adicional?**

MUITO OBRIGADO PELA CONTRIBUIÇÃO E EM BREVE TRAREMOS UM RETORNO E UMA CONTINUIDADE !!!
